# Supplementary material for: Luminescent silver(i) complexes with pyrazole-tetraphenylethene ligands: turn-on fluorescence due to the coordination-driven rigidification and solvent-oriented structural transformation
Source: Royal Society of Chemistry journal article supplement (doi:10.1039/d0dt04100a), 2021-01-01
Supplement: d0dt04100a1.pdf [file d0dt04100a1.pdf]

## **Electronic supplementary information (ESI)**

### **Luminescent silver(I) complexes with pyrazole-tetraphenylethene ligand: turn-on fluorescence due to the coordination-driven rigidification and solvent-oriented structural transformation**

Zou-Hong Xu, Zi-Qing Huang, Xiao-Hui Liu, Yue Zhao, Yi Lu and Wei-Yin Sun\*

*Coordination Chemistry Institute, State Key Laboratory of Coordination Chemistry, School of Chemistry and Chemical Engineering, Nanjing National Laboratory of Microstructures, Collaborative Innovation Center of Advanced Microstructures, Nanjing University, Nanjing 210023, China.*

\* Corresponding author.

*Email address:* sunwy@nju.edu.cn (W. Y. Sun).

**Table S1 Crystal data and structure refinements for Ag complexes.**

| Compound                                                                                                                                                                                                                                                                                                                                                                               | 1                                                                                                             | 2                                                                                                           |
|----------------------------------------------------------------------------------------------------------------------------------------------------------------------------------------------------------------------------------------------------------------------------------------------------------------------------------------------------------------------------------------|---------------------------------------------------------------------------------------------------------------|-------------------------------------------------------------------------------------------------------------|
| Formula                                                                                                                                                                                                                                                                                                                                                                                | C <sub>39</sub> H <sub>30</sub> Cl <sub>2</sub> F <sub>12</sub> N <sub>8</sub> P <sub>2</sub> Ag <sub>2</sub> | C <sub>40</sub> H <sub>28</sub> F <sub>6</sub> N <sub>8</sub> O <sub>6</sub> S <sub>2</sub> Ag <sub>2</sub> |
| Formula weight                                                                                                                                                                                                                                                                                                                                                                         | 1187.29                                                                                                       | 1110.56                                                                                                     |
| Crystal system                                                                                                                                                                                                                                                                                                                                                                         | monoclinic                                                                                                    | Triclinic                                                                                                   |
| Space group                                                                                                                                                                                                                                                                                                                                                                            | <i>C2/c</i>                                                                                                   | <i>P-1</i>                                                                                                  |
| a (Å)                                                                                                                                                                                                                                                                                                                                                                                  | 20.5979(11)                                                                                                   | 10.9590(11)                                                                                                 |
| b (Å)                                                                                                                                                                                                                                                                                                                                                                                  | 12.0244(7)                                                                                                    | 11.9156(12)                                                                                                 |
| c (Å)                                                                                                                                                                                                                                                                                                                                                                                  | 17.0561(9)                                                                                                    | 19.0477(19)                                                                                                 |
| α(°)                                                                                                                                                                                                                                                                                                                                                                                   | 90                                                                                                            | 104.755(3)                                                                                                  |
| β(°)                                                                                                                                                                                                                                                                                                                                                                                   | 97.202(2)                                                                                                     | 91.935(3)                                                                                                   |
| γ(°)                                                                                                                                                                                                                                                                                                                                                                                   | 90                                                                                                            | 105.054(3)                                                                                                  |
| V (Å <sup>3</sup> )                                                                                                                                                                                                                                                                                                                                                                    | 4191.1(4)                                                                                                     | 2309.4(4)                                                                                                   |
| Z                                                                                                                                                                                                                                                                                                                                                                                      | 4                                                                                                             | 2                                                                                                           |
| D <sub>calc</sub> (g cm <sup>-3</sup> )                                                                                                                                                                                                                                                                                                                                                | 1.882                                                                                                         | 1.597                                                                                                       |
| μ (mm <sup>-1</sup> )                                                                                                                                                                                                                                                                                                                                                                  | 6.925                                                                                                         | 5.631                                                                                                       |
| F (000)                                                                                                                                                                                                                                                                                                                                                                                | 2344                                                                                                          | 1104                                                                                                        |
| Reflections collected                                                                                                                                                                                                                                                                                                                                                                  | 15509                                                                                                         | 31081                                                                                                       |
| Unique reflections                                                                                                                                                                                                                                                                                                                                                                     | 3786                                                                                                          | 8321                                                                                                        |
| Data/restraints/parameters                                                                                                                                                                                                                                                                                                                                                             | 3786 / 72 / 349                                                                                               | 8321 / 0 / 650                                                                                              |
| Goodness-of-fit on <i>F</i> <sup>2</sup>                                                                                                                                                                                                                                                                                                                                               | 1.047                                                                                                         | 1.016                                                                                                       |
| R <sub>1</sub> <sup>a</sup> [I > 2σ(I)]                                                                                                                                                                                                                                                                                                                                                | 0.0335                                                                                                        | 0.0296                                                                                                      |
| wR <sub>2</sub> <sup>b</sup> [I > 2σ(I)]                                                                                                                                                                                                                                                                                                                                               | 0.0855                                                                                                        | 0.0840                                                                                                      |
| R <sub>1</sub> [all data]                                                                                                                                                                                                                                                                                                                                                              | 0.0351                                                                                                        | 0.0316                                                                                                      |
| wR <sub>2</sub> [all data]                                                                                                                                                                                                                                                                                                                                                             | 0.0866                                                                                                        | 0.0857                                                                                                      |
| CCDC#                                                                                                                                                                                                                                                                                                                                                                                  |                                                                                                               |                                                                                                             |
| <sup>a</sup> R <sub>1</sub> = Σ   <i>F</i> <sub>o</sub>   -   <i>F</i> <sub>c</sub>   /Σ  <i>F</i> <sub>o</sub>  .                                                                                                                                                                                                                                                                     |                                                                                                               |                                                                                                             |
| <sup>b</sup> wR <sub>2</sub> =  Σw(  <i>F</i> <sub>o</sub>   <sup>2</sup> -   <i>F</i> <sub>c</sub>   <sup>2</sup> )/Σ w( <i>F</i> <sub>o</sub> ) <sup>2</sup>   <sup>1/2</sup> , where w = 1/[σ <sup>2</sup> ( <i>F</i> <sub>o</sub> ) <sup>2</sup> + ( <i>aP</i> ) <sup>2</sup> + <i>bP</i> ]. P = ( <i>F</i> <sub>o</sub> ) <sup>2</sup> + 2 <i>F</i> <sub>c</sub> <sup>2</sup> /3. |                                                                                                               |                                                                                                             |

|                                                                                                                                                                                                                                                                                                                                                                                       | <b>3</b>                                                                                                                       | <b>4</b>                                                                                        |
|---------------------------------------------------------------------------------------------------------------------------------------------------------------------------------------------------------------------------------------------------------------------------------------------------------------------------------------------------------------------------------------|--------------------------------------------------------------------------------------------------------------------------------|-------------------------------------------------------------------------------------------------|
| Formula                                                                                                                                                                                                                                                                                                                                                                               | C <sub>80</sub> H <sub>56</sub> Ag <sub>4</sub> F <sub>12</sub> N <sub>16</sub> O <sub>12</sub> S <sub>4</sub> Ag <sub>4</sub> | C <sub>114</sub> H <sub>84</sub> N <sub>24</sub> F <sub>18</sub> P <sub>3</sub> Ag <sub>3</sub> |
| Formula weight                                                                                                                                                                                                                                                                                                                                                                        | 2221.12                                                                                                                        | 2548.59                                                                                         |
| Crystal system                                                                                                                                                                                                                                                                                                                                                                        | Triclinic                                                                                                                      | Cubic                                                                                           |
| Space group                                                                                                                                                                                                                                                                                                                                                                           | <i>P</i> -1                                                                                                                    | <i>I</i> 4 <sub>1</sub> 32                                                                      |
| a (Å)                                                                                                                                                                                                                                                                                                                                                                                 | 14.1282(7)                                                                                                                     | 28.6728(6)                                                                                      |
| b (Å)                                                                                                                                                                                                                                                                                                                                                                                 | 14.4177(7)                                                                                                                     | 28.6728(6)                                                                                      |
| c (Å)                                                                                                                                                                                                                                                                                                                                                                                 | 14.7363(7)                                                                                                                     | 28.6728(6)                                                                                      |
| α(°)                                                                                                                                                                                                                                                                                                                                                                                  | 85.093(2)                                                                                                                      | 90                                                                                              |
| β(°)                                                                                                                                                                                                                                                                                                                                                                                  | 68.925(2)                                                                                                                      | 90                                                                                              |
| γ(°)                                                                                                                                                                                                                                                                                                                                                                                  | 73.243(2)                                                                                                                      | 90                                                                                              |
| V (Å <sup>3</sup> )                                                                                                                                                                                                                                                                                                                                                                   | 2681.5(2)                                                                                                                      | 23572.8(15)                                                                                     |
| Z                                                                                                                                                                                                                                                                                                                                                                                     | 1                                                                                                                              | 8                                                                                               |
| D <sub>calc</sub> (g cm <sup>-3</sup> )                                                                                                                                                                                                                                                                                                                                               | 1.375                                                                                                                          | 1.355                                                                                           |
| μ (mm <sup>-1</sup> )                                                                                                                                                                                                                                                                                                                                                                 | 4.849                                                                                                                          | 3.272                                                                                           |
| F (000)                                                                                                                                                                                                                                                                                                                                                                               | 1104                                                                                                                           | 9720                                                                                            |
| Reflections collected                                                                                                                                                                                                                                                                                                                                                                 | 35849                                                                                                                          | 85814                                                                                           |
| Unique reflections                                                                                                                                                                                                                                                                                                                                                                    | 9433                                                                                                                           | 3619                                                                                            |
| Data/restraints/parameters                                                                                                                                                                                                                                                                                                                                                            | 9433 / 0 / 577                                                                                                                 | 3619 / 78 / 237                                                                                 |
| Goodness-of-fit on <i>F</i> <sup>2</sup>                                                                                                                                                                                                                                                                                                                                              | 1.19                                                                                                                           | 1.148                                                                                           |
| R <sub>1</sub> <sup>a</sup> [I > 2σ(I)]                                                                                                                                                                                                                                                                                                                                               | 0.0869                                                                                                                         | 0.057                                                                                           |
| wR <sub>2</sub> <sup>b</sup> [I > 2σ(I)]                                                                                                                                                                                                                                                                                                                                              | 0.2014                                                                                                                         | 0.1528                                                                                          |
| R <sub>1</sub> [all data]                                                                                                                                                                                                                                                                                                                                                             | 0.1003                                                                                                                         | 0.0633                                                                                          |
| wR <sub>2</sub> [all data]                                                                                                                                                                                                                                                                                                                                                            | 0.2083                                                                                                                         | 0.1597                                                                                          |
| CCDC#                                                                                                                                                                                                                                                                                                                                                                                 |                                                                                                                                |                                                                                                 |
| <sup>a</sup> R <sub>1</sub> = Σ   <i>F</i> <sub>o</sub>   -   <i>F</i> <sub>c</sub>   /Σ  <i>F</i> <sub>o</sub>  .                                                                                                                                                                                                                                                                    |                                                                                                                                |                                                                                                 |
| <sup>b</sup> wR <sub>2</sub> = [Σw(  <i>F</i> <sub>o</sub>   <sup>2</sup> -   <i>F</i> <sub>c</sub>   <sup>2</sup> )/Σw( <i>F</i> <sub>o</sub> ) <sup>2</sup> ] <sup>1/2</sup> , where w = 1/[σ <sup>2</sup> ( <i>F</i> <sub>o</sub> ) <sup>2</sup> + ( <i>aP</i> ) <sup>2</sup> + <i>bP</i> ]. P = ( <i>F</i> <sub>o</sub> ) <sup>2</sup> + 2 <i>F</i> <sub>c</sub> <sup>2</sup> /3. |                                                                                                                                |                                                                                                 |

|                                                                                                                                                                                                                                                                                                                                                                                       | <b>6</b>                                                                        | <b>7</b>                                                                       |
|---------------------------------------------------------------------------------------------------------------------------------------------------------------------------------------------------------------------------------------------------------------------------------------------------------------------------------------------------------------------------------------|---------------------------------------------------------------------------------|--------------------------------------------------------------------------------|
| Formula                                                                                                                                                                                                                                                                                                                                                                               | C <sub>114</sub> H <sub>84</sub> N <sub>27</sub> O <sub>9</sub> Ag <sub>3</sub> | C <sub>38</sub> H <sub>28</sub> N <sub>10</sub> O <sub>6</sub> Ag <sub>2</sub> |
| Formula weight                                                                                                                                                                                                                                                                                                                                                                        | 2299.71                                                                         | 936.44                                                                         |
| Crystal system                                                                                                                                                                                                                                                                                                                                                                        | Cubic                                                                           | Orthorhombic                                                                   |
| Space group                                                                                                                                                                                                                                                                                                                                                                           | <i>I</i> 4 <sub>1</sub> 32                                                      | <i>P</i> 2 <sub>1</sub> 2 <sub>1</sub> 2 <sub>1</sub>                          |
| a (Å)                                                                                                                                                                                                                                                                                                                                                                                 | 28.4267(7)                                                                      | 9.953(2)                                                                       |
| b (Å)                                                                                                                                                                                                                                                                                                                                                                                 | 28.4267(7)                                                                      | 13.918(3)                                                                      |
| c (Å)                                                                                                                                                                                                                                                                                                                                                                                 | 28.4267(7)                                                                      | 25.775(5)                                                                      |
| α(°)                                                                                                                                                                                                                                                                                                                                                                                  | 90                                                                              | 90                                                                             |
| β(°)                                                                                                                                                                                                                                                                                                                                                                                  | 90                                                                              | 90                                                                             |
| γ(°)                                                                                                                                                                                                                                                                                                                                                                                  | 90                                                                              | 90                                                                             |
| V (Å <sup>3</sup> )                                                                                                                                                                                                                                                                                                                                                                   | 22971.0(17)                                                                     | 3570.5(13)                                                                     |
| Z                                                                                                                                                                                                                                                                                                                                                                                     | 8                                                                               | 4                                                                              |
| D <sub>calc</sub> (g cm <sup>-3</sup> )                                                                                                                                                                                                                                                                                                                                               | 1.294                                                                           | 1.742                                                                          |
| μ (mm <sup>-1</sup> )                                                                                                                                                                                                                                                                                                                                                                 | 3.094                                                                           | 1.161                                                                          |
| F (000)                                                                                                                                                                                                                                                                                                                                                                               | 9112                                                                            | 1872                                                                           |
| Reflections collected                                                                                                                                                                                                                                                                                                                                                                 | 77455                                                                           | 33591                                                                          |
| Unique reflections                                                                                                                                                                                                                                                                                                                                                                    | 3545                                                                            | 8197                                                                           |
| Data/restraints/parameters                                                                                                                                                                                                                                                                                                                                                            | 3545 / 0 / 227                                                                  | 8197 / 0 / 505                                                                 |
| Goodness-of-fit on <i>F</i> <sup>2</sup>                                                                                                                                                                                                                                                                                                                                              | 1.112                                                                           | 1.033                                                                          |
| R <sub>1</sub> <sup>a</sup> [ <i>I</i> > 2σ( <i>I</i> )]                                                                                                                                                                                                                                                                                                                              | 0.0478                                                                          | 0.0431                                                                         |
| wR <sub>2</sub> <sup>b</sup> [ <i>I</i> > 2σ( <i>I</i> )]                                                                                                                                                                                                                                                                                                                             | 0.1265                                                                          | 0.0826                                                                         |
| R <sub>1</sub> [all data]                                                                                                                                                                                                                                                                                                                                                             | 0.0491                                                                          | 0.0853                                                                         |
| wR <sub>2</sub> [all data]                                                                                                                                                                                                                                                                                                                                                            | 0.1272                                                                          | 0.1015                                                                         |
| CCDC#                                                                                                                                                                                                                                                                                                                                                                                 |                                                                                 |                                                                                |
| <sup>a</sup> R <sub>1</sub> = Σ   <i>F</i> <sub>o</sub>   -   <i>F</i> <sub>c</sub>   /Σ  <i>F</i> <sub>o</sub>  .                                                                                                                                                                                                                                                                    |                                                                                 |                                                                                |
| <sup>b</sup> wR <sub>2</sub> =  Σw(  <i>F</i> <sub>o</sub>   <sup>2</sup> -   <i>F</i> <sub>c</sub>   <sup>2</sup> )/Σ w( <i>F</i> <sub>o</sub> ) <sup>2</sup>   <sup>1/2</sup> , where w = 1/[σ <sup>2</sup> ( <i>F</i> <sub>o</sub> <sup>2</sup> ) + ( <i>aP</i> ) <sup>2</sup> + <i>bP</i> ]. P = ( <i>F</i> <sub>o</sub> <sup>2</sup> + 2 <i>F</i> <sub>c</sub> <sup>2</sup> )/3. |                                                                                 |                                                                                |

**Table S2.** Selected bond lengths (Å) and angles (°) for Ag complexes.

| <b>1</b>                                                                                                                          |           |                     |           |
|-----------------------------------------------------------------------------------------------------------------------------------|-----------|---------------------|-----------|
| Ag(1)-N(1)#1                                                                                                                      | 2.129(3)  | Ag(1)-N(4)          | 2.133(3)  |
| N(1)#1-Ag(1)-N(4)                                                                                                                 | 174.51(9) |                     |           |
| Symmetry transformations used to generate equivalent atoms:<br>#1 -x+1,y,-z+1/2;                                                  |           |                     |           |
| <b>2</b>                                                                                                                          |           |                     |           |
| Ag(1)-N(5)                                                                                                                        | 2.156(2)  | Ag(1)-O(5)          | 2.578(6)  |
| Ag(1)-N(1)                                                                                                                        | 2.161(2)  | Ag(2)-N(4)          | 2.174(2)  |
| Ag(1)-O(5')                                                                                                                       | 2.581(6)  | Ag(2)-N(8)          | 2.192(2)  |
| N(5)-Ag(1)-N(1)                                                                                                                   | 175.26(8) | N(5)-Ag(1)-O(5)     | 86.85(15) |
| N(5)-Ag(1)-O(5')                                                                                                                  | 92.35(16) | N(1)-Ag(1)-O(5)     | 90.51(15) |
| N(1)-Ag(1)-O(5')                                                                                                                  | 86.45(16) | N(4)-Ag(2)-N(8)     | 177.59(8) |
| <b>3</b>                                                                                                                          |           |                     |           |
| Ag(1)-N(1)                                                                                                                        | 2.187(9)  | Ag(2)-N(4)          | 2.195(7)  |
| Ag(1)-N(8)                                                                                                                        | 2.190(8)  | Ag(2)-N(5)          | 2.195(8)  |
| N(1)-Ag(1)-N(8)                                                                                                                   | 175.0(3)  | N(4)-Ag(2)-N(5)     | 169.3(3)  |
| <b>4</b>                                                                                                                          |           |                     |           |
| Ag(1)-N(1)                                                                                                                        | 2.385(6)  | Ag(1)-N(4)#2        | 2.402(8)  |
| N(1)#1-Ag(1)-N(1)                                                                                                                 | 88.6(3)   | N(4)#2-Ag(1)-N(4)#3 | 116.0(4)  |
| N(1)-Ag(1)-N(4)#2                                                                                                                 | 90.4(2)   | N(1)-Ag(1)-N(4)#3   | 138.8(3)  |
| Symmetry transformations used to generate equivalent atoms:<br>#1 z-3/4,-y+5/4,x+3/4; #2 -y+1/2,-z+1,x+1/2; #3 x-1/4,z+1/4,-y+5/4 |           |                     |           |
| <b>6</b>                                                                                                                          |           |                     |           |
| Ag(1)-N(2)#1                                                                                                                      | 2.374(6)  | Ag(1)-N(4)          | 2.385(6)  |
| N(2)#1-Ag(1)-N(2)#2                                                                                                               | 115.8(3)  | N(2)#1-Ag(1)-N(4)   | 139.5(2)  |
| N(4)#3-Ag(1)-N(4)                                                                                                                 | 88.0(3)   | N(2)#2-Ag(1)-N(4)   | 90.3(2)   |
| Symmetry transformations used to generate equivalent atoms:<br>#1 -x+1/2,y,-z; #2 x-1/4,z+1/4,-y+1/4; #3 -x+1/4,-z+1/4,-y+1/4     |           |                     |           |
| <b>7</b>                                                                                                                          |           |                     |           |
| Ag(1)-N(8)#1                                                                                                                      | 2.210(5)  | Ag(2)-N(2)          | 2.205(7)  |
| Ag(1)-N(6)                                                                                                                        | 2.217(6)  | Ag(2)-O(2)          | 2.318(7)  |
| Ag(1)-O(4)                                                                                                                        | 2.487(6)  | Ag(2)-O(1)          | 2.550(6)  |

|                   |          |                 |           |
|-------------------|----------|-----------------|-----------|
| N(8)#1-Ag(1)-N(6) | 146.6(2) | N(2)-Ag(2)-O(2) | 157.7(2)  |
| N(8)#1-Ag(1)-O(4) | 118.0(2) | N(2)-Ag(2)-O(1) | 139.4(2)  |
| N(6)-Ag(1)-O(4)   | 94.2(2)  | O(2)-Ag(2)-O(1) | 52.78(19) |

Symmetry transformations used to generate equivalent atoms:

#1  $x+1/2, -y+1/2, -z+1$ ;

---

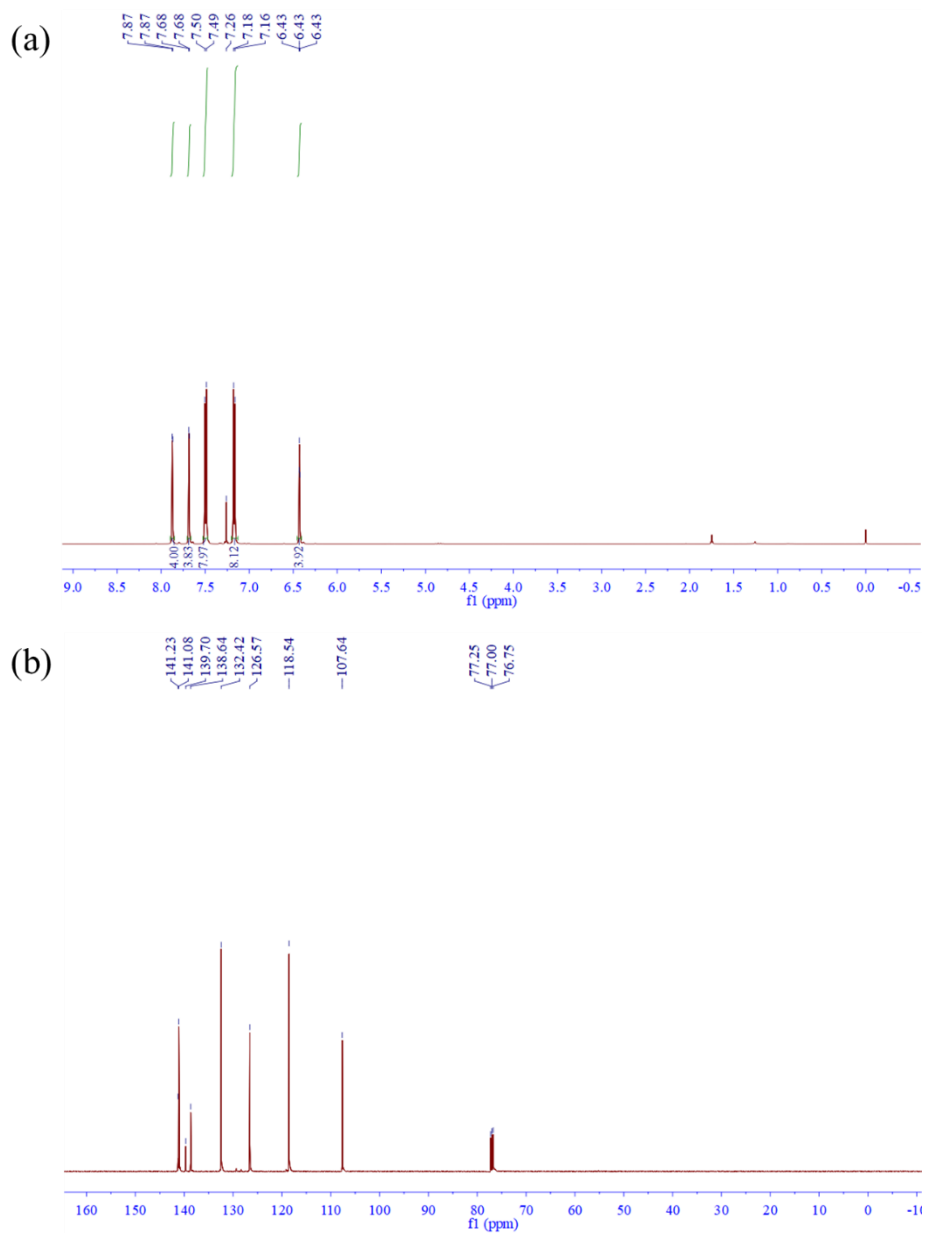

**Fig. S1**  $^1\text{H}$  NMR (a) and  $^{13}\text{C}$  NMR spectra (b) of ligand **L** in  $\text{CDCl}_3$ .

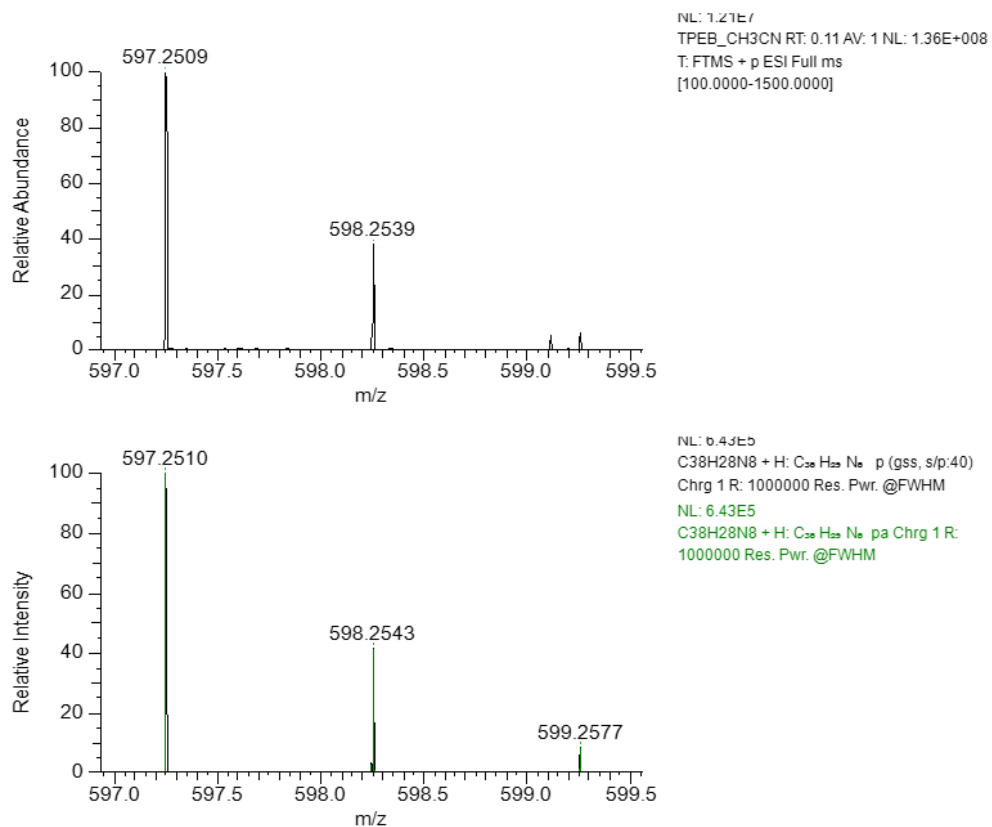

**Fig. S2** High resolution mass spectrum of ligand **L** in acetonitrile (upper) and simulated ion  $[\text{C}_{38}\text{H}_{28}\text{N}_8 + \text{H}]^+$  (below).



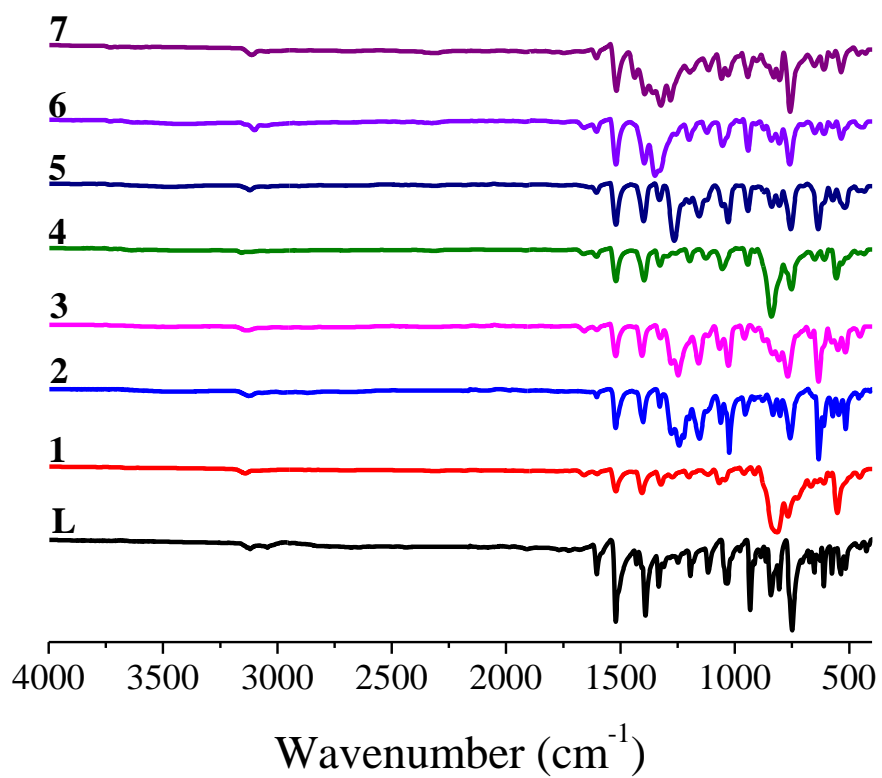

**Fig. S3** FT-IR spectra of ligand **L** and Ag complexes.

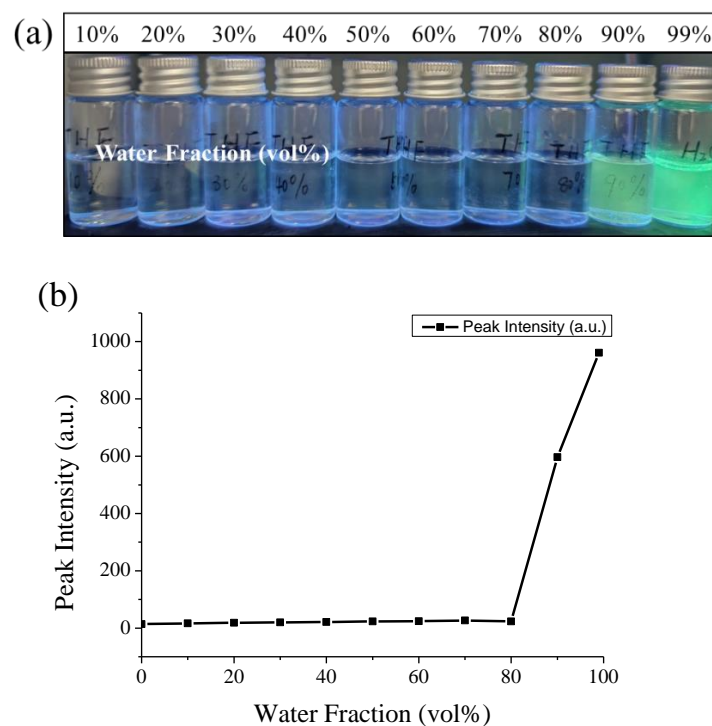

**Fig. S4** (a) Images of **L** in THF with the increasing water fraction under UV light. (b) Plots of fluorescence intensity in mixtures of THF/water by varying H<sub>2</sub>O content in the range of 0–99%.

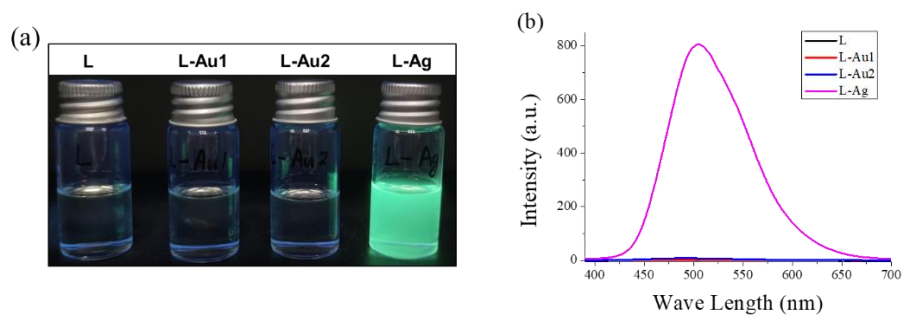

**Fig. S5** (a) Images of **L** in CH<sub>2</sub>Cl<sub>2</sub> (2 mg/5 mL) with addition of 2 equivalents chloro(dimethylsulfide)gold(I) (Me<sub>2</sub>SAuCl, **Au1**), chloro(triphenylphosphine)gold(I) (Ph<sub>3</sub>PAuCl, **Au2**) and AgCF<sub>3</sub>SO<sub>3</sub> under UV light. (b) Fluorescence spectra of **L** in CH<sub>2</sub>Cl<sub>2</sub> in absence and presence of **Au1**, **Au2** and AgCF<sub>3</sub>SO<sub>3</sub> ( $\lambda_{\text{ex}} = 367$  nm).

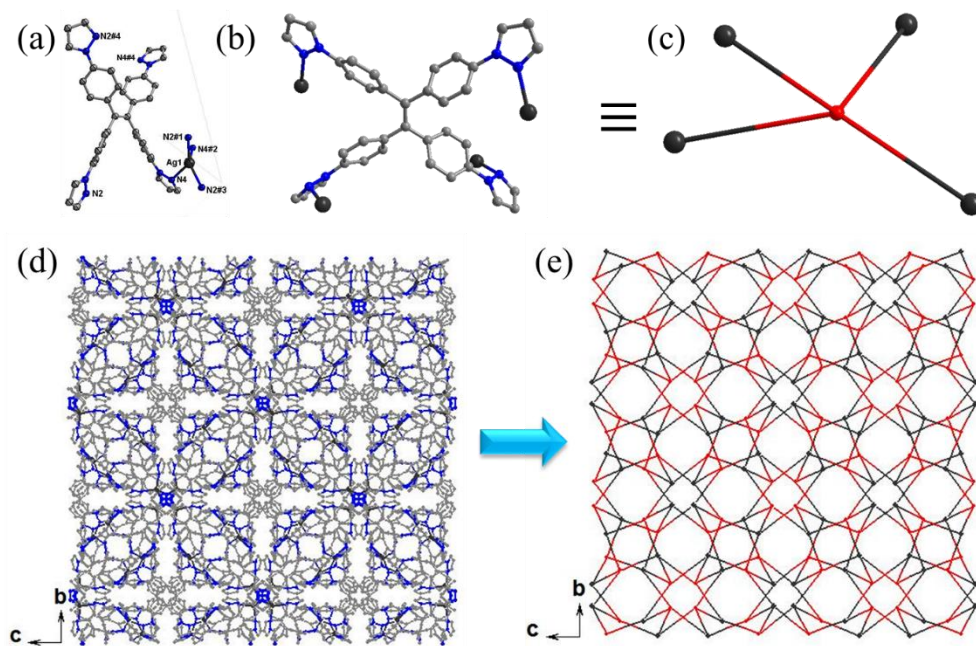

**Fig. S6** Crystal structures and simplified schematic diagram of **6**.

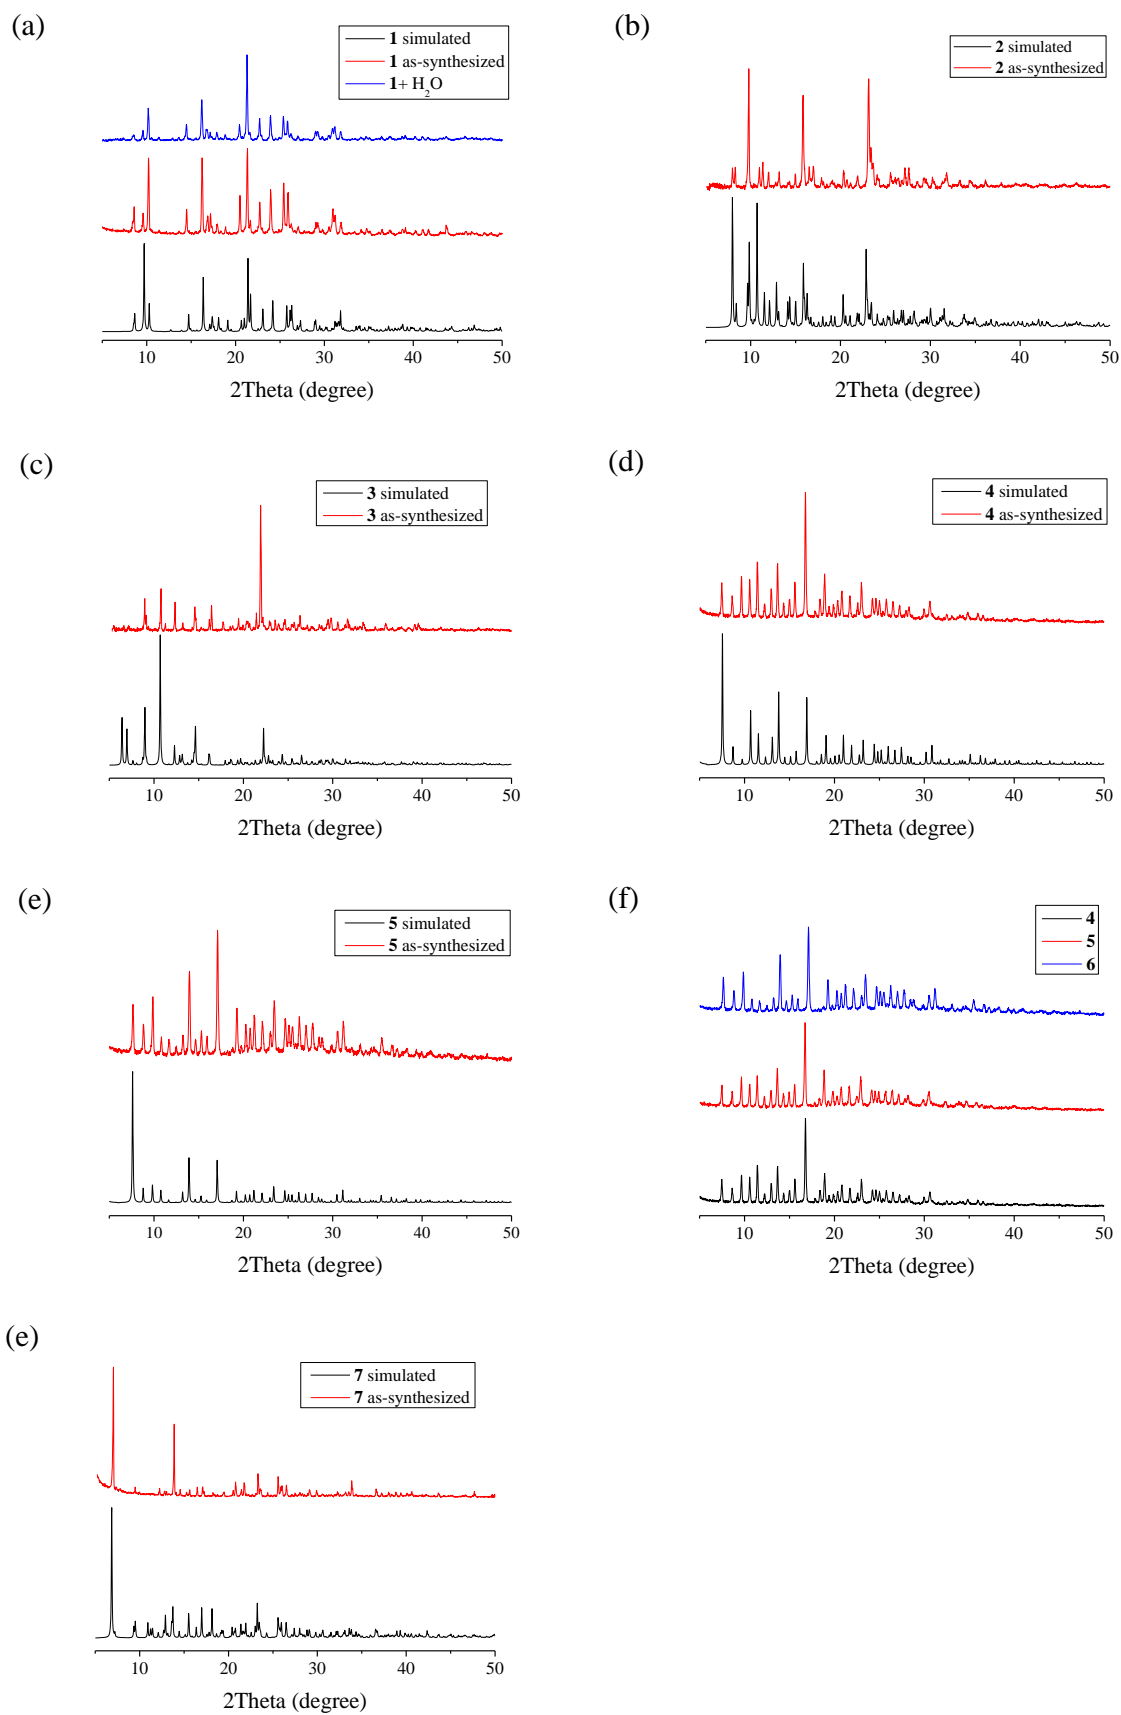

**Fig. S7** PXRD patterns of Ag complexes.

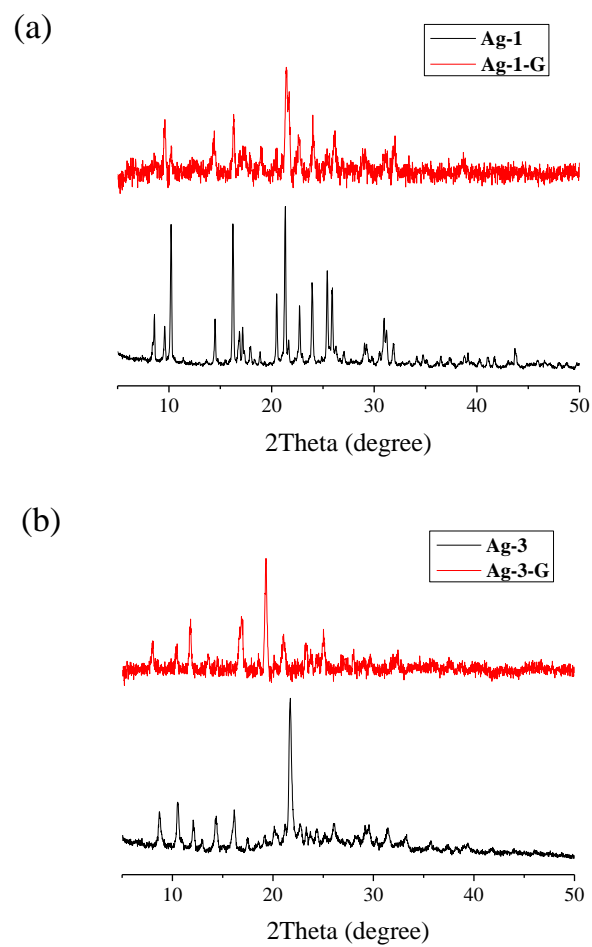

**Fig. S8** (a) PXR D patterns of **1** before and after grinding. (b) PXR D patterns of **3** before and after grinding.

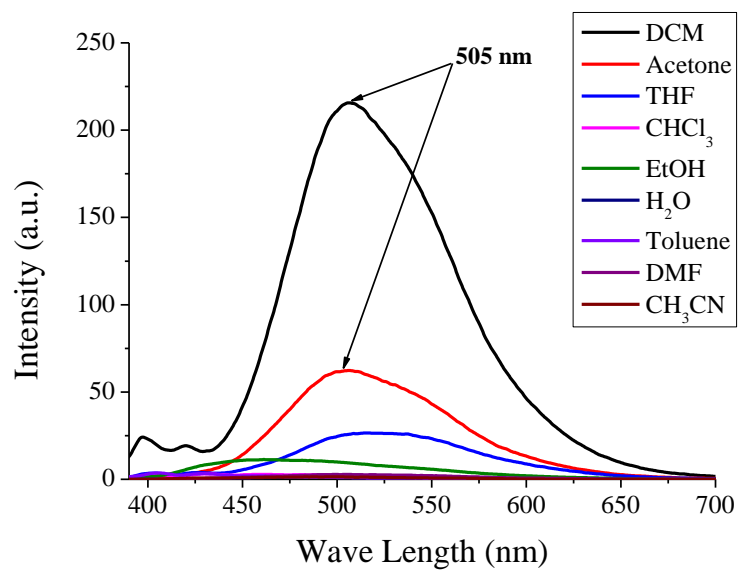

**Fig. S9** Emission spectra of the filtered solutions for **1** dispersed in different solvents (2 mg/5 mL).

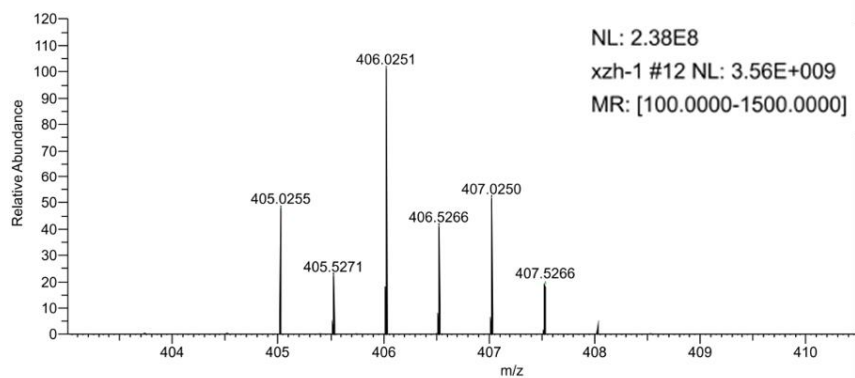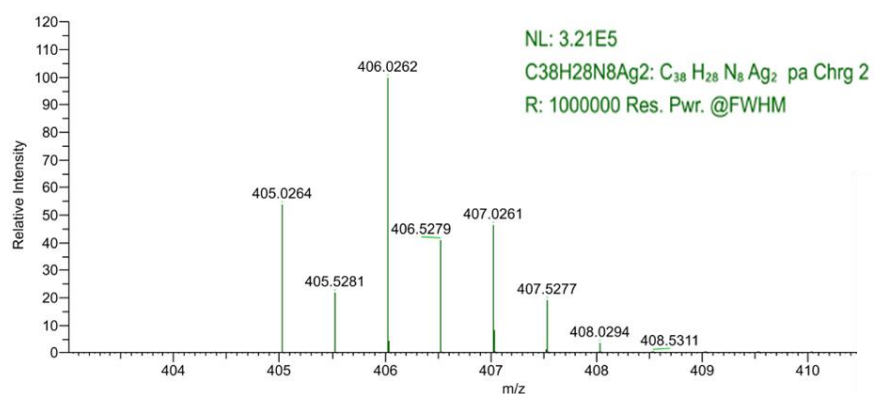

**Fig. S10** High resolution mass spectrum of **1** in acetonitrile (upper) and simulated ion  $[\text{Ag}_2(\text{L})]^{2+}$  (below).

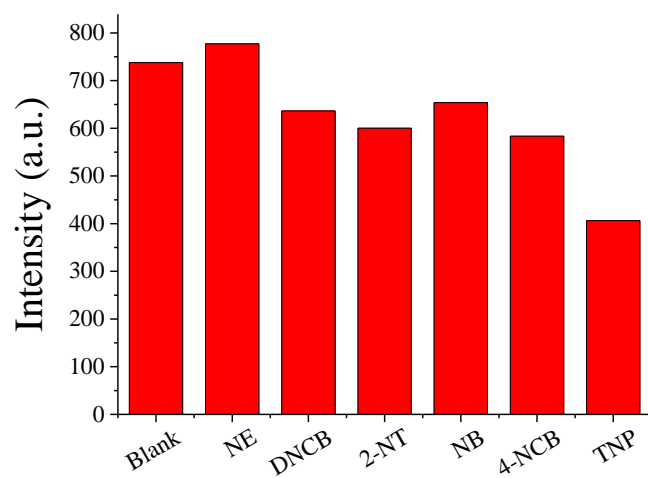

**Fig. S11** Fluorescence intensity of the  $\text{CH}_2\text{Cl}_2$  solution of **1** (2 mg/5 mL) upon addition of  $\text{CH}_2\text{Cl}_2$  solution of different nitro-compounds (400  $\mu\text{L}$ , 5 mM).
